# Individual structural features

## constrain the functional connectome

Francesca Melozzi<sup>1\*</sup>, Eyal Bergmann<sup>2\*</sup>, Julie A. Harris<sup>3</sup>, Itamar Kahn<sup>2\*\*</sup>,  
Viktor Jirsa<sup>1\*\*</sup>, Christophe Bernard<sup>1\*\*</sup>

\*Equal contribution first authors

\*\*Equal contribution last authors

1. Aix Marseille Univ, Inserm, INS, Institut de Neurosciences des Systèmes, Marseille, France

2. Department of Neuroscience, Rappaport Faculty of Medicine, Technion – Israel Institute of Technology, Haifa, Israel

3. Allen Institute for Brain Science, Seattle, United States

*Corresponding authors:*

Christophe Bernard and Viktor Jirsa

[christophe.bernard@univ-amu.fr](mailto:christophe.bernard@univ-amu.fr) ; [viktor.jirsa@univ-amu.fr](mailto:viktor.jirsa@univ-amu.fr)

**Keywords:** connectome, MRI, resting-state, large-scale models

## 22 **ABSTRACT:**

23 **Whole brain dynamics intuitively depends upon the internal wiring of the brain; but to which**  
24 **extent the individual structural connectome constrains the corresponding functional connectome**  
25 **is unknown, even though its importance is uncontested. After acquiring structural data from**  
26 **individual mice, we virtualized their brain networks and simulated *in silico* functional MRI data.**  
27 **Theoretical results were validated against empirical awake functional MRI data obtained from the**  
28 **same mice. We demonstrate that individual structural connectomes predict the functional**  
29 **organization of individual brains. Using a virtual mouse brain derived from the Allen Mouse Brain**  
30 **Connectivity Atlas, we further show that the dominant predictors of individual structure-function**  
31 **relations are the asymmetry and the weights of the structural links. Model predictions were**  
32 **validated experimentally using tracer injections, identifying which missing connections (not**  
33 **measurable with diffusion MRI) are important for whole brain dynamics. Individual variations**  
34 **thus define a specific structural fingerprint with direct impact upon the functional organization of**  
35 **individual brains, a key feature for personalized medicine.**

## 36 **SIGNIFICANCE STATEMENT:**

37 The structural connectome is a key determinant of brain function and dysfunction. The connectome-  
38 based model approach aims to understand the functional organization of the brain by modeling the  
39 brain as a dynamical system and then studying how the functional architecture rises from the  
40 underlying structural skeleton. Here, taking advantage of mice studies, we systematically  
41 investigated the informative content of different structural features in explaining the emergence of  
42 the functional ones. We demonstrate that individual variations define a specific structural  
43 fingerprint with a direct impact upon the functional organization of individual brains stressing the  
44 importance of using individualized models to understand brain function. We show how limitations  
45 of connectome reconstruction with the diffusion-MRI method restrict our comprehension of the  
46 structural-functional relation.

47

## 48 INTRODUCTION

49 Structural connectivity (SC) refers to set of physical links between brain areas (Connectome,  
50 (1)) and constitutes an individual fingerprint in humans (2, 3). Since the connectome provides the  
51 physical substrate for information flow in the brain, it should impose strong constraints on whole  
52 brain dynamics. Functional connectivity (FC), in the context of resting-state functional MRI, refers  
53 to coherent slow spontaneous fluctuations in the blood oxygenation level-dependent (BOLD) signals  
54 measured in the passive awake individual. FC is commonly used to assess whole brain dynamics and  
55 function (4). Similar to SC, FC constitutes an individual functional fingerprint (5–7), and shows  
56 specific alterations during aging and in brain disorders (8). There is thus a strong correlation  
57 between the structural and the functional connectome. However, the causal relation between SC  
58 and FC remains unknown. Large scale brain modeling offers a way to explore causality between  
59 structural and functional connectivity. Combining experimental and theoretical approaches, we  
60 here unravel and quantify the degree to which the individual's SC explains the same individual's  
61 variations in FC.

62 We use The Virtual Brain (TVB), which allows building individual brain network models based  
63 on structural data (9). This brain network modeling approach operationalizes the functional  
64 consequences of structural network variations (10, 11) and allows to systematically investigate SC-  
65 FC relations in individual human brains (12–15). If SC constrains FC, SC-based simulations of FC  
66 should match empirical FC within the bounds of validity of the metric. In primates and rodents,  
67 individual SCs are derived from diffusion MRI (dMRI). However, dMRI does not provide information  
68 on fiber directionality and suffers from limitations, such as underestimation of fiber length and  
69 misidentification of crossing fiber tracks (16, 17). Given the imprecision of dMRI derived SC, it is  
70 difficult to estimate the validity of the simulations. This would require the knowledge of the ground  
71 truth connectome of an individual, which cannot be measured at present. However, the currently  
72 best gold standard can be derived in mice from cellular-level tracing of axonal projections (18), here  
73 named the Allen connectome. Although individuality is lost (the SC is a composite of many mice)  
74 and despite other limitations (19, 20), the Allen connectome provides details not available  
75 otherwise and in particular not available in humans. Focusing our attention on simulating mouse  
76 brain dynamics, we can thus use this detailed connectome to explore which missing features in the  
77 dMRI account for individual SC-FC relations. Specifically, we predict that fiber directionality and fine  
78 grain connectivity patterns should be key determinants.

79 Using dMRI data of 19 mice, we constructed 19 virtual mouse brain models (21), and  
80 compared predicted FC with empirical FC data acquired from the same mice during passive  
81 wakefulness (22). We found that individual SC predicts individual FC better than the dMRI-based  
82 averaged SC, and that predictions can be improved by considering fiber directionality, coupling  
83 weights and specific fiber tracks derived from the Allen connectome. We also found that  
84 hemispherical lateralization in the mouse connectome influences whole brain dynamics.

85

## 86 **RESULTS**

87 We collected both dMRI and awake resting-state fMRI data (7 sessions per animal) from 19 hybrid  
88 B6/129P mice. We extracted SC from dMRI data to build individual virtual brains, which were  
89 imported into The Virtual Mouse Brain (TVMB), the extension of the open source neuroinformatic  
90 platform TVB (9) designed for accommodating large-scale simulations and analysis in the mouse, to  
91 generate *in silico* BOLD activity (21) using the reduced Wong Wang model (14, 23). We then  
92 compared simulated and empirical FC for each mouse in order to assess the power that an individual  
93 SC has to predict individual empirical FC derived from resting-state fMRI data (Figure 1). Further, SC  
94 was also obtained from the Allen connectome (our gold standard) in TVMB (21) to determine the  
95 contribution of information not available in dMRI-based SC. Experimental and simulated resting-  
96 state activity was characterized by a dynamical switching between stable functional configurations  
97 as revealed by the typical checkerboard patterns of Functional Connectivity Dynamics (FCD, Figure  
98 S1a and S1b), as observed previously (14, 24, 25). As expected, FCD varied across recording sessions  
99 (Figure S1b). In contrast, static Functional Connectivity (FC) was stable between experimental  
100 recording sessions (Figure 2A and Figure S1c). To compare the goodness of *in silico* resting-state  
101 dynamics against *in vivo* data, we needed a metric stable across experimental recording sessions in  
102 individual subjects, and thus we used the static FC for evaluating the Predictive Power (PP) of a SC.

103 We first defined the upper bound of the PP. The correlation value calculated between any  
104 pair of empirical FC for each mouse provides us with an upper boundary of the PP, taking into  
105 account inter-session variability and other sources of noise that preclude 100% PP accuracy (7, 26).  
106 In keeping with human data (6, 27), we found a high inter-session correlation for each of the 19  
107 mice, demonstrating stability across different recording sessions in a given mouse (Figure 2A). Inter-  
108 session correlations within the same animal were greater than inter-subject correlations, indicating  
109 that there is an individual functional organization per mouse, which may act as a functional

110 fingerprint. Next, we sought to examine the extent to which individual functional connectomes  
111 correspond to individual structural connectomes.

### 112 113 **SC obtained with a deterministic algorithm is a better predictor of FC**

114 Here we considered probabilistic (Figure 2B) and deterministic (Figure 2C) dMRI-based SCs,  
115 using SD\_Stream (28) and iFOD2 (29) within Mrtrix3 software (28) tractography algorithms,  
116 respectively. SC obtained with the deterministic algorithm yielded a greater PP than the SC obtained  
117 with the probabilistic one ( $PP_{Individual-det} = 0.415 \pm 0.005$ ,  $PP_{Individual-prob} = 0.392 \pm 0.005$ ,  
118  $mean \pm SD / \sqrt{N}$ , Welch's test:  $P < 0.001$  Figure 2E). The significant density difference in the two  
119 kind of connectomes ( $Density_{Individual-prob} = 69 \pm 1\%$ ,  $Density_{Individual-det} = 28.2 \pm 0.2\%$ ,  
120 Welch's test:  $P < 0.001$ ), by itself, is not enough to explain the observed discrepancy in the PP.  
121 Connection density does not fully account for the predictive power of a connectome, but instead  
122 the relation depends on the connectome derivation (Figure S2). We argue that the observed  
123 difference in PP between deterministic and probabilistic processed connectomes depends on the  
124 proportion of false negative (FN) and false positive (FP) connections introduced by the two different  
125 algorithms: Zalesky and colleagues (2016)(30) show that the typical brain small-world topology is  
126 biased by the introduction of FP connections two times more than by the introduction of FN  
127 connections. In line with this finding, we attribute the difference in PP of the two connectomes to  
128 the detrimental role of FP connections, which are more likely introduced by probabilistic than  
129 deterministic tractography. However, deterministic tractography more likely overlooks some  
130 connections, introducing FN. This highlights the importance of preserving SC specificity (FN versus  
131 FP) versus SC sensitivity (FP versus FN) in the context of large-scale models. Namely, to preserve the  
132 global topology, specificity is more important as sensitivity in SC reconstruction. In the following,  
133 we compared deterministic SC-based simulated and empirical FCs.

### 134 135 **Individual SC is the best predictor of individual FC**

136 Next, we found that individual SCs had a greater predictive power than the averaged SC  
137 ( $PP_{Individual-det} = 0.415 \pm 0.005$ ,  $PP_{AVG-det} = 0.377 \pm 0.003$ , Welch's test:  $P <$   
138  $0.001$ ,  $PP_{Individual-prob} = 0.392 \pm 0.005$ ,  $PP_{AVG-prob} = 0.349 \pm 0.004$ , Welch's test:  $P < 0.001$ ;  
139 Figure 2E), showing the importance of individual SCs. Although the Allen SC was obtained from  
140 hundreds of different mice, we found that it had a greater PP than individual dMRI-based SCs

141 ( $PP_{Individual-det} = 0.415 \pm 0.005$ ,  $PP_{Tracer} = 0.488 \pm 0.005$ , Welch's test:  $P < 0.001$ ; Figure  
142 2D,E), suggesting that the tracer-based connectome has structural information that is not present  
143 in dMRI, but which is central to explain the emergence of the functional connectome, even at the  
144 individual level. As the Allen SC was built from C57BL/6 mice, we verified the generality of our results  
145 in this strain (Figure S3a). Global signal regression, which improves structure-function relations and  
146 averaging recording sessions within each mouse (31), which reduces noise, increased the PP but did  
147 not alter the results (Figure S3b-c). Finally, splitting the recording sessions of each mouse, and  
148 submitting the data to a test-retest analysis revealed a close agreement between datasets (Figure  
149 S3d). Thus, our conclusions are strain- and preprocessing-independent, and reproducible.

150

### 151 **Importance of long-range connections and directionality**

152 To identify the source of the systematic superior performance of the Allen SC, we focused  
153 on the major limitations of dMRI: (1) difficulty to resolve long axonal tracts, (2) lack of information  
154 on fiber directionality and (3) imprecise estimation of connection weights. We estimated the  
155 contribution of fiber length by filtering the Allen SC to include only fibers present in the dMRI-based  
156 SC (Figure 3A); we characterized the role of fiber directionality by symmetrizing the Allen SC (Figure  
157 3A), asymmetrizing the dMRI-based SC (Figure 3B), and quantifying the impact of each manipulation  
158 (Figure 3C).

159 Since dMRI fiber reconstruction reliability is inversely proportional to fiber length (16, 32,  
160 33), dMRI SCs are sparser than the Allen SC (Figure 2B-C-D, S2a). To test the influence of the missing  
161 fibers in predicting FC, we built a filtered Allen SC (Figure 3A), which includes only the connections  
162 contained in at least one of the 19 deterministic dMRI SCs. The filtered connectome contains the  
163 32% of the connections of the original tracer connectome, that are those captured by the dMRI-  
164 based deterministic processed connectomes. The connections that remain after the filtering  
165 operation are mainly those characterized by short-range length (Figure S2B): the averaged path  
166 length of the connections in the original and filtered tracer-based connectome is  $5.40 \pm 0.02$  mm and  
167  $3.57 \pm 0.03$  mm, respectively (Welch's test,  $P < 0.001$ ). Figure 3C shows that the PP of the filtered Allen  
168 SC is lower than the original Allen SC ( $PP_{Tracer\ filtered} = 0.461 \pm 0.005$ ,  $PP_{Tracer} = 0.488 \pm$   
169  $0.005$ , Welch's test:  $P < 0.001$ ; Figure 3C), however it remains statistically greater than the PP of  
170 individual SCs ( $PP_{Individual-det} = 0.415 \pm 0.005$ , Welch's test:  $P < 0.001$ ; Figure 3C). Thus,  
171 although connections overlooked by the dMRI method, which are mainly long-range connections,  
172 are important to explain FC, other important structural features present in the Allen SC are

173 necessary to explain the discrepancy in PP between the tracer-based and dMRI-based connectomes.  
174 We next focused on fiber directionality, since imposing bidirectional communication between  
175 regions connected with unidirectional links *in vivo* may affect FC. We used an approach based on  
176 surrogate SCs to test the role of directionality. Since the Allen SC contains directionality between  
177 regions, we removed this information by symmetrizing it (Figure 3A). Figure 3C shows that  
178 symmetrizing the Allen SC reduces its PP significantly ( $PP_{Tracer\ sym} = 0.418 \pm 0.004$ ,  $PP_{Tracer} =$   
179  $0.488 \pm 0.005$ , Welch's test:  $P < 0.001$ ; Figure 3C), making it comparable to the PP of the dMRI-  
180 based SCs (Welch's test,  $P < 0.001$ ). This demonstrates that directionality is a key determinant of  
181 FC. It is notable that symmetrizing the filtered Allen SC led to a more modest reduction of the PP  
182 than the symmetrisation of the original Allen SC ( $PP_{Tracer\ sym} = 0.418 \pm 0.004$ ,  
183  $PP_{Tracer\ filtered\ \&\ sym} = 0.446 \pm 0.004$ , Welch's test:  $P < 0.001$ ; Figure 3C). We argue that the PP  
184 difference can be explained by considering the amount of false positive introduced in the surrogate  
185 connectomes by the transformation: the filtering operation inserts FN connections, while the  
186 symmetrisation operation inserts both FN and FP connections (34). It follows that the symmetrized  
187 and filtered connectome contains less FP than just the symmetrized connectome. Thus, as  
188 previously discussed for the tractography processing, introducing FP connections, as produced by  
189 the symmetrisation but not by the filtering, is more detrimental than the introduction of FN  
190 connections. To summarize when the tracer-based connectome is manipulated in order to remove  
191 the information not detected by dMRI, which is the inability to detect (i) the directionality of brain  
192 connections, as well as, (ii) some brain connections, especially the long-range ones, we found that  
193 the removal of the directionality information biases the predictive power of the connectome more  
194 than the removal of the connections not detected by the dMRI method.

195 We then took the complementary approach: enriching the dMRI-based SC with information on fiber  
196 directionality, i.e. asymmetrizing it. The results show that asymmetrizing the dMRI SCs does not  
197 increase, but rather decreases the PP ( $PP_{Individual-det} = 0.415 \pm 0.005$ ,  $PP_{Individual-det-asym} =$   
198  $0.394 \pm 0.005$ , Welch's test:  $P = 0.001$ ,  $PP_{Individual-prob} = 0.392 \pm 0.005$ ,  
199  $PP_{Individual-prob-asym} = 0.377 \pm 0.005$ , Welch's test  $P = 0.02$ ; Figure 3B,C). We argue that the  
200 asymmetrization of the dMRI connectomes biased the PP because asymmetrizing a matrix is an ill-  
201 posed problem, since there is no unique solution (more details can be found in the Methods). In  
202 addition, there is no 1:1 correspondence between the connection strengths obtained with dMRI  
203 (axonal bundles) and Allen ones (axonal branches) since axons tend to branch more or less profusely  
204 when reaching their target zone.

205

## 206 **Connection strengths as key determinants of FC**

207           The symmetric filtered Allen SC and the deterministic dMRI SCs have a similar structure: both  
208 matrices are symmetric and contain the same number of elements. Since the PP of the symmetric  
209 filtered Allen SC is still greater than the dMRI one, the difference can only result from dissimilarities  
210 in the values of the matrices' entries, i.e. the connection strength values. Figure 3D shows that there  
211 is a significant relation between the normalized U-statistics of the Mann-Whitney test calculated  
212 between the filtered symmetric Allen SC and the individual dMRI SC and the PP of the latter ( $r =$   
213  $0.52, P = 0.02$ ). Namely, the more the distribution of connection strengths of the deterministic  
214 dMRI is similar to that of the Allen SC, the more reliable the predictions are. From the analysis of  
215 the topological characteristics of the SCs, it emerges that there is a significant linear relation ( $r =$   
216  $-0.55, P = 0.014$ ; Figure S4d) between the PP of the deterministic dMRI SCs and the level of  
217 topological organization of the connectome as a small world network, i.e. high local clustering yet  
218 short average path (35) as measured by the Small World Propensity of a network (36). Specifically,  
219 the more similar the network's connection topology of the dMRI SC is to the Allen one, the more  
220 reliable the predictions are (Figure S4c-d).

221

## 222 **Specific refinement of individual dMRI connectomes**

223           Since some afferent and efferent connections of specific areas may not be reliably  
224 reconstructed with dMRI, we examined whether refining dMRI SCs with more precise patterns  
225 derived from the Allen SC would improve the PP. For each deterministic dMRI SC, we substituted  
226 the non-zero incoming and outgoing connections of a specific region with the corresponding Allen  
227 SC projections, thus building a *hybrid* connectome (Figure 4A, S5A).

228           When considering all mice, we found that substituting the anterior cingulate areas and the  
229 right caudoputamen connectivity patterns with the Allen SC projections significantly improved the  
230 PP of the connectome (left ACA<sub>d</sub>, improvement  $=0.047 \pm 0.006$ ,  $t=7.23$ ,  $P<0.001$ ; left ACA<sub>v</sub>,  
231 improvement  $0.032 \pm 0.006$ ,  $t=4.96$ ,  $P=0.002$ ; right ACA<sub>v</sub>, improvement  $=0.028 \pm 0.003$ ,  $t=7.58$ ,  
232  $P<0.001$ ; right CP, improvement  $=0.018 \pm 0.003$ ,  $t=6.42$ ,  $P < 0.001$ ; Figure 4B), suggesting that both  
233 regions are poorly resolved by dMRI in mice. Importantly, the majority of substitutions decreased  
234 the PP (Figure 4B). For each animal, we quantified the specificity of each connection with respect to  
235 the other mice. Figure S5b shows that there is a relation between the connection specificity and the  
236 change in PP when the corresponding connections are replaced with the non-specific tracer ones.



237 This result confirms that the specificity of connections in individuals is a key feature for brain  
238 dynamics.

239 For each individual SC, we identified the region in which replacement of its dMRI-  
240 connections with the Allen ones generates a new connectome,  $\text{hybrid}^{\text{best}}$ , which has the best PP  
241 improvement as compared to the other hybrid connectomes (Figure S5a). Figure 4C shows that the  
242 PP achieved by  $\text{hybrid}^{\text{best}}$  is statistically indistinguishable to the one achieved by the filtered Allen  
243 SC (Welch's test:  $P = 0.95$ ). In other words, it is sufficient to replace in the dMRI SC the connections  
244 of one particular region with the corresponding Allen ones, to get a similar prediction, which is  
245 specific for each mouse.

246

### 247 **The asymmetric mouse brain**

248 Finally, we sought to estimate the potential contribution of asymmetric transhemispheric  
249 connectivity. Figure 4D shows that there is a considerable improvement in the PP of hybrid SCs when  
250 using connections from the right hemisphere, as compared to those from the left one. The Allen  
251 connections have been estimated using unilateral injection in the right hemisphere (18). Since no  
252 tracer injections were done in the left hemisphere, TVMB uses a mirror image of the right  
253 hemisphere to build the left one (21). This suggests that the tracer-based intra-hemispheric  
254 connectivity predicts better right intra-hemispheric functional behavior than the left one, as  
255 demonstrated in Figure S6a. Figure 4E shows that there is a significant relation between hemispheric  
256 lateralization in the functional connectomes and the improvement in PP when the right and left  
257 homotopic tracer area's connections are introduced in the dMRI SC ( $r = 0.14, P = 0.01$ ). Namely,  
258 the more functional connections are asymmetric, the more the PP decreases when using the right  
259 hemisphere connections to build the left ones. These results suggest that connectivity asymmetry  
260 impacts brain dynamics and that it is region- and mouse-specific.

261

### 262 **Hemispherical lateralization of the mouse brain**

263 Figure 4E shows that the region demonstrating the greatest lateralization in terms of  
264 functional connectivity in individual mice is the supplemental somatosensory area (SSs). Figure 4B  
265 shows that when we introduce the mirror image of the right SSs into the dMRI SC, the predictive  
266 power is considerably decreased, which means that the mirror image of the right SSs poorly  
267 represents the true left SSs. We thus focused on the SSs area. If SC drives FC, we predicted that  
268 introducing in the tracer-based connectome the detailed left SSs connections, instead of using the

269 mirror image of the right SSs ones, would increase the PP of the connectome. We first performed  
270 tracer injections in the left SSs and determined the projection pattern. As predicted, we found  
271 evidence of an asymmetric distribution of fibers between the left and right SSs (Figure 5A). To test  
272 whether these structural differences were sufficient to explain the functional ones, we introduced  
273 the connections of the left SSs into the tracer connectome and obtained a statistically greater PP as  
274 compared to the ones of purely mirrored connectomes built from the injection experiments  
275 performed in the right SSs (Figure 5B). Next, we introduced the left connections of the SSs into the  
276 dMRI-based SCs (hybrid connectome), and, as predicted, we found a greater PP as compared to  
277 using the mirror image of the right connections of the SSs as shown in Figure 5C (between the 14  
278 experiments performed in the right SSs we take into account the one whose injection location is  
279 more similar to those used in the left SSs injection experiment). Finally, since our previous results  
280 demonstrate that the lateralization is animal-dependent, we sought to examine whether lateralized  
281 FC is supported by lateralized SC, and found that the improvement of the PP following hybridization  
282 of left SSs dMRI connections is indeed proportional to the degree of functional lateralization ( $r =$   
283  $0.42, P = 0.01$ ; Figure 5D). Together, these results show that the mouse brain is structurally  
284 lateralized, and that this lateralization impacts whole brain dynamics at the individual subject-level.  
285

286

## 287 **DISCUSSION**

288 Our results provide direct evidence of a type of causality between SC and FC, in the sense  
289 that individual structural connectomes predict their functional counterparts better than the dMRI-  
290 based averaged connectomes. Previous studies utilized the Allen Mouse Connectivity Atlas to study  
291 structure-function relations at the group level using voltage-sensitive dyes (37) and FC (22, 25, 38).  
292 In addition, a recent work in rats (39) used TVB to simulate FC based on SC and found strong  
293 correlation at the group level; a similar finding has been reported in humans (40). Here we compared  
294 structure-function relations in individual brains and we used the detailed Allen connectome as a  
295 gold standard to identify regions and connections that play a preeminent role in the emergence of  
296 individual brain dynamics. We showed that, similar to humans (6), intra-mice FCs are more stable  
297 than inter-mice FCs (Figure 2A). We propose that the emergence of the personal features in the  
298 functional data is, at least partially, driven by the emergence of underlying individual-specific  
299 structural organization with individual stable features (Figure 2E). Notwithstanding, we cannot

300 exclude that the variations in hemodynamic response functions (HRF) across animals and brain  
301 location affect SC-FC relations, as it has been shown in humans (41). However, the fact that we  
302 analyzed awake animals reduces the impact of this confounding factor (42, 43).

303 The detrimental role of false positive (FP) connections in the connectome topology has been  
304 explored by (30) and (34) analyzing, respectively, the effect of FP as introduced by probabilistic  
305 tractography and overlooking connections' directionality. In line with these findings, we showed  
306 that the introduction of FP connections biases the connectome predictions. We found the dMRI-  
307 based connectomes processed with the deterministic tractography have a statistically greater PP  
308 than those processed with probabilistic algorithms. Since the observed difference in PP is not  
309 directly related with the difference in connections density (Figure S2), we argue that the difference  
310 in PP is driven by the different characteristics of the connections overlooked by both types of  
311 tractography processing: more FP and less FN in the case of probabilistic processed connectivity,  
312 and conversely in the case of deterministic processed connectivity. This highlights that brain  
313 dynamics predictions are more accurate if connectome specificity is preserved, even at the cost of  
314 sensitivity, as it is the case of deterministic processed connectome.

315 When processing the tracer-based data, the probabilistic computational model used to  
316 construct the original Allen connectome (18) may introduce several false negative connections,  
317 resulting in a low connection density reconstruction (35-73%), whilst others reported a 97% density  
318 (19, 20). Here, we have used the Allen connectome builder interface, which implements a  
319 deterministic approach to reconstruct whole brain connectivity (21), leading to a 98% density of  
320 connections. Still, as shown in Figure 3B, the introduction of FN connections (filtered tracer-based  
321 connectome) does not dramatically influence the PP of the connectome.

322 The main drawback of the Allen connectome is that it has been obtained from hundreds of  
323 different mice, thus blurring individual variability. In keeping with this, we found that replacing most  
324 individual dMRI connections with Allen connections reduces the PP. However, in some regions such  
325 as the anterior cingulate and the caudoputamen, group-level Allen connections outperform  
326 individual dMRI connections. This finding can be explained by the fact that connections from the  
327 anterior cingulate are difficult to resolve as this area is located in the midline brain region, where  
328 the cortex folds, resulting in an abrupt change in fiber directionality. Moreover, the axons make  
329 sharp turns around the corpus callosum while the extraction algorithm assumes a logical  
330 continuation of the vector direction. The connections of the striatum are often short and, due to its  
331 multipolar organization without a clear gradient orientation limiting fiber reconstruction. To sum

332 up, including the tracer information of these complex fiber pathways in the dMRI-based  
333 connectome significantly increases the predictive power of individual connectomes. It would be  
334 interesting to test the same procedure when using whole brain modeling of human individuals by  
335 including tracer information from non-human primates experiments.

336 Although the Allen connectome was obtained from C57BL/6 mice, brain dynamics of hybrid  
337 F1 mice could be predicted by the Allen connectome, suggesting that the structural organization of  
338 the mouse brain was not impacted by out-breeding. Findings from hybrid mice are considered more  
339 generalizable to other strains (44), thus suggesting that the pattern observed here is not strain-  
340 specific. Nonetheless, since the genetic background affects the behavioral phenotype (45), it will be  
341 important to systematically assess these findings in mouse strains where this aspect is directly  
342 manipulated.

343 The Allen SC includes directionality and long-range connections, which are not well (or at all)  
344 resolved by dMRI. However, the removal of the connections not resolved by dMRI-based  
345 connectomes, mostly those characterized by long-range length, is not sufficient to explain the  
346 discrepancy between the tracer-based and dMRI-based predictive power. In addition, we showed  
347 that removing the directionality information from the tracer-based connectome, that it is  
348 symmetrizing the connectome, thus introducing FP and FN connections, worsens the predictive  
349 power more than the filtering operation, that consist in introducing just FN connections (34). This  
350 shows the key role of connections directionality in predicting brain dynamics; and it confirms our  
351 results on tractography algorithm processing: FP connections biases the predictive power ability of  
352 the connectome more than FN. Finally, analyzing the connections strength differences between the  
353 dMRI and tracer-based connectome, we have showed that connection strengths are the main  
354 determinant of these dynamics, and consequently of individuality (Figure 3D).

355 An unexpected result was the important role played by the transhemispheric asymmetry of  
356 connections. This finding is consistent with calcium imaging studies reporting such asymmetry in  
357 rodents (46). By comparing injections between left and right hemispheres, we confirmed our  
358 prediction that the approximation of left areas connections as right areas' connections, necessary  
359 in the tracer-based connectome reconstruction, significantly affect the predictive power of the  
360 connectome. Moreover, we showed that the bias introduced by this approximation is proportional  
361 to the degree of the individual animal's functional lateralization.

362 Progress in connectomics enabled the development of large-scale brain models to study brain  
363 function in health and disease (12, 47). Although individual whole brain modelling has a potentially

364 high translational value for the benefit of patients (15, 48, 49), the entire approach relies on the  
365 extent to which individual differences in structural connectomes determine the emergent network  
366 dynamics and consequent neuroimaging signals. Although SC does not provide enough  
367 information to predict an epileptogenic zone in humans (50), our work shows that using more  
368 precise information (e.g. obtained from tracer injections in non-human primates) to take into  
369 account directionality, synaptic weights and poorly-resolved dMRI connections, will increase the  
370 predictive power. Our here demonstrated link of individual SC and FC variability and brain network  
371 modeling bears the promise to build a systematic approach to individual diagnosis and clinical  
372 decision making (15, 47).

## 373 **MATERIALS AND METHODS**

### 374 **1.1. Animals and Surgical Procedures**

375 All procedures were conducted in accordance with the ethical guidelines of the National Institutes  
376 of Health and were approved by the institutional animal care and use committee (IACUC) at  
377 Technion. 19 male first generation hybrid mice (B6129PF/J1, 9-12 weeks old) were implanted with  
378 MRI compatible head-posts using dental cement as previously described (22). After 3 days of  
379 recovery, the animals were acclimatized to extended head fixation. This training included 5 handling  
380 sessions performed over 3-5 days, and 4 daily acclimatization sessions inside the MRI scanner. In  
381 each acclimatization session, mice were briefly anesthetized with isoflurane (5%), and then head-  
382 fixed to a custom-made cradle for gradually longer periods (2, 5, 10, 25 min). Subsequently, mice  
383 underwent seven 45 min long awake imaging sessions, and one diffusion tensor imaging (DTI)  
384 session under continuous isoflurane anesthesia (0.5-1%). A second group that included 7 male  
385 inbred C57BL/6 mice (11-16 weeks old) was operated and scanned according to the same protocol.  
386 Experiments involving mice were approved by the Institutional Animal Care and Use Committees of  
387 the Allen Institute for Brain Science in accordance with NIH guidelines. For left side injections into  
388 SSs, surgical procedures were followed as described in (18). In brief, a pan-neuronal AAV expressing  
389 EGFP (rAAV2/1.hSynapsin.EGFP.WPRE.bGH, Penn Vector Core, AV-1-PV1696, Addgene ID 105539)  
390 was used for injections into wildtype C57BL/6J mice at postnatal day 56 (stock no. 00064, The  
391 Jackson Laboratory). SSs was targeted using stereotaxic coordinates from Bregma (AP: -0.7, ML, -  
392 3.4 and -3.9) and from brain surface (DV: 1.66). rAAV was delivered by iontophoresis with current  
393 settings of 3  $\mu$ A at 7 s 'on' and 7 s 'off' cycles for 5 min total, using glass pipettes (inner tip diameters  
394 of 10–20  $\mu$ m). Mice were perfused transcardially and brains collected 3 weeks post-injection for  
395 imaging using serial two-photon tomography, using methods as previously described for the Allen  
396 Mouse Connectivity Atlas (18).

397

### 398 **1.2. Data acquisition (fMRI and diffusion-MRI)**

399 MRI scans were performed at 9.4 Tesla MRI (Bruker BioSpin GmbH, Ettlingen, Germany) using a  
400 quadrature 86 mm transmit-only coil and a 20 mm loop receive-only coil (Bruker). Mice were shortly  
401 anesthetized (5% isoflurane) before mounted on the cradle. After acquisition of a short low-  
402 resolution rapid acquisition process with a relaxation enhancement (RARE) T1-weighted structural  
403 volume (TR = 1500 ms, TE = 8.5 ms, RARE-factor = 4, FA = 180°, 30 coronal slices, 150 × 150 × 450

404  $\mu\text{m}^3$  voxels, no interslice gap, FOV  $19.2 \times 19.2 \text{ mm}^2$ , matrix size of  $128 \times 128$ ), four spin echo EPI (SE-  
405 EPI) runs measuring BOLD fluctuations were acquired (TR = 2500 ms, TE = 18.398 ms, 200 time  
406 points, FA =  $90^\circ$ , 30 coronal slices,  $150 \times 150 \times 450 \mu\text{m}^3$  voxels, no interslice gap, FOV  $14.4 \times 9.6$   
407  $\text{mm}^2$ , matrix size of  $128 \times 128$ ). In addition, mice underwent another session under anesthesia to  
408 acquire high resolution T2 image (TR = 6000 ms, TE = 8.8 ms, RARE-factor = 16, FA =  $180^\circ$ , 36 coronal  
409 slices,  $100 \times 100 \times 400 \mu\text{m}^3$  voxels, FOV  $16 \times 16 \text{ mm}^2$ , matrix size of  $160 \times 160$ , 10 averages) and  
410 diffusion tensor imaging data (DTI) with a diffusion-weighted spin-echo echo-planar imaging (EPI)  
411 pulse sequence (TR = 9000 ms, TE = 21.68 ms,  $\Delta/\delta=11/2.6 \text{ ms}$ , 4 EPI segments, 30 gradient directions  
412 with a single b-value at  $1000 \text{ s/mm}^2$  and three images with b-value of  $0 \text{ s/mm}^2$  (B0), 36 slices,  $100 \times$   
413  $100 \times 400 \mu\text{m}^3$  voxels, FOV  $16 \times 16 \text{ mm}^2$ , matrix size of  $160 \times 160$ , 2 averages). Each DTI acquisition  
414 took 39.6 min.

415

### 416 **1.3. Data processing**

#### 417 **Intrinsic functional connectivity data:**

418 fMRI data preprocessing procedure was validated in a previous study (22). Briefly, the first two time  
419 points were removed for T1-equilibration effects, slice-dependent time shifts were compensated,  
420 head motion was corrected using rigid body correction, volumes were registered to a downsampled  
421 version of the Allen Mouse Brain Atlas, and data underwent intensity normalization. Then, motion  
422 scrubbing procedure was applied to remove motion-related artifacts as previously shown. A  
423 rigorous censoring criteria were used including frame displacement (FD) of  $50 \mu\text{m}$  and temporal  
424 derivative root mean square variance over voxels (DVARS) of 105% of median. An augmented  
425 temporal mask of 1 frame before and 2 frames after detected motion was used and sequences of  
426 less than 5 included frames were also censored. Runs with less than 50 frames, and sessions with  
427 less than 125 frames (5.2 mins) were excluded. The average number of included sessions per mouse  
428 was  $6.31 \pm 0.82$  (mean $\pm$ SD) for the F1 hybrid mice and  $3.71 \pm 2.21$  for the C57BL/6 inbred mice. Total  
429 included time per session was  $15.7 \pm 4.4$  (minutes per session, mean $\pm$ SD) and  $11.41 \pm 3.67$ ,  
430 respectively.

431

432 After motion scrubbing, resting-state fMRI specific preprocessing procedure was applied including  
433 demeaning and detrending, nuisance regression of 6 motion axes, ventricular and white matter  
434 signals and their derivatives, temporal filter ( $0.009 < f < 0.08 \text{ Hz}$ ), and spatial smoothing (Gaussian  
435 kernel with FWHM of  $450 \mu\text{m}$ .) The C57BL/6 group was preprocessed both with and without global

436 signal regression to test the effects of this procedure on structure-function relations.  
437 To estimate functional connectomes, we build a parceled volume with a resolution compatible with  
438 the fMRI technical constraints by manipulating the Allen Mouse Brain Connectivity Atlas (18)  
439 downloaded through The Virtual Brain (9, 21). The volume was registered to the space of the  
440 functional data ('target.nii.gz') using the nearest neighbor interpolation (FLIRT software, (51)). The  
441 parcellation was reduced only to the areas where the SNR was higher than 12, and that had a volume  
442 greater than 10 voxels ( $>0.1\text{mm}^3$ ). Finally, very anterior and posterior areas, such as the main  
443 olfactory bulb and cerebellum, were excluded from the parcellation due to registration problems  
444 and susceptibility artifacts associated with the head-post implantation. Once the parcellation  
445 volume was built, mean BOLD signals were extracted from the voxels composing each parcel, and  
446 correlations were calculated from included frames only (based on motion scrubbing).

447

#### 448 **Diffusion-MRI data:**

449 We processed diffusion-MRI data using MRtrix3 software (28).  
450 The fiber orientation distribution of each voxel was estimated using the Constrained Spherical  
451 Deconvolution (CSD, (52)). To obtain the tract streamlines we integrated the field of orientation  
452 probability density using both deterministic (SD\_Stream, (28)) and probabilistic (iFOD2, (29))  
453 algorithms; in both cases, the tracts number was set to 100 million. The streamlines were then  
454 filtered using the SIFT algorithm (53) which selectively reduces the number of tracts exploiting the  
455 fiber orientation density information obtained through the CSD in the previous step. The filtered  
456 tracts of the right SSp-bfd obtained with probabilistic and deterministic algorithm, for an illustrative  
457 mouse, are shown in Figure 2B and 2C respectively. We defined seed regions using the Allen Mouse  
458 Brain Connectivity Atlas (18) obtained through the The Virtual Brain (9, 21); after registering the  
459 volume in the individual mouse diffusion space, we reduced the parcellation only to those areas  
460 whose volume was greater than 250 voxels ( $>1.125\text{mm}^3$ ).  
461 Using the deterministic and probabilistic streamlines and the node parcellation image, we  
462 generated a connectome. The connection strength between each pair of nodes was defined as the  
463 streamline count between the two nodes scaled by the inverse of the volumes of the two areas. A  
464 radial research was performed to assign each streamline end point to a given node. If no node was  
465 found inside a sphere of 1 mm radius, the streamline was not assigned to any node. We excluded  
466 all self-connections by setting the diagonal elements of the connectome to zero and normalized all  
467 connection strengths between 0 and 1. Then, we repeated this procedure for all mice. An example



468 of personalized connectome obtained with probabilistic and deterministic algorithm is shown in  
469 Figure 2B and 2C, respectively.

470

#### 471 **Tracer data:**

472 The recent updates of The Virtual Brain software (9, 21) allows us to manipulate the anterograde  
473 tracer experiments performed at the Allen Institute (18) in order to obtain a very precise mouse  
474 connectome. Unless otherwise specified, the tracer-based connectome is built averaging  
475 experiments performed injecting the tracing compound in the areas in the right hemisphere.

476 One of the main differences between tracer and diffusion-MRI technique is the spatial resolution;  
477 in order to discard this factor as a cause of diversity in the reconstructed connectome, the seed  
478 areas included in the tracer connectome are the same as the ones included in the diffusion-MRI  
479 connectome. As for the diffusion-MRI connectome, the self-connections were excluded and the  
480 connection strengths were normalized between 0 and 1. The tracer connectome is shown in Figure  
481 2D.

482 To evaluate the impact of introducing connections of the left SSs obtained injecting the tracing  
483 compound in the left structure (and not in the right structure as generally done in the building  
484 procedure) we built tracer-based connectome using the information of just one experiment per area  
485 (Figure S6b). In particular in Figure 5B we evaluate how reconstructing left SSs connections using  
486 different experiments (14 injection experiments performed in the right SSs and 1 injection  
487 experiment in the left SSs) impact the Predictive Power of the tracer connectome.

488

#### 489 **1.4. Surrogate connectomes**

490 Connectomes derived with different methodologies (e.g. tracer experiments, deterministic or  
491 probabilistic diffusion-MRI tractography) give rise to different simulated resting state dynamics.  
492 Since in this study we always use the same large-scale model to simulate the functional brain  
493 patterns (reduced Wong Wang model in the bistable configuration, see section simulated  
494 dynamics), the observed differences are determined uniquely by the different structural  
495 organization used to conceptualize the brain network, i.e. the connectome.

496 In order to test different hypotheses about what could be the connectivity properties that give rise  
497 to the observed discrepancies in the simulated dynamics, we built different kinds of surrogate  
498 connectomes as described in what follows.

499

500 **Averaged connectome: the role of individual variability**

501 In order to assess the role of individual variability in dMRI data, we built an averaged connectome,  
502 both for deterministic and probabilistic tractography. We defined the averaged connectome as a  
503 matrix whose entry  $\hat{w}_{ij}$ , i.e. the connection strength between area  $i$  and area  $j$ , is the arithmetic  
504 mean of the values of the connection strength  $w_{ij}$  of the  $N$  individual dMRI connectomes containing  
505 both area  $i$  and area  $j$ :

506 
$$\hat{w}_{ij} = \frac{1}{N} \sum_{n=1}^N w_{ij}^n$$

507 (1)

508 where  $n$  is the connectome index.

509

510 **Filtered connectome: the role of long range connections**

511 Comparing the connectomes in Figure 2B-D it is possible to notice that the number of long range  
512 connections detected with probabilistic, and more dramatically with deterministic, tractography is  
513 drastically lower than the one retrieved with the tracer method. It is well known that the accuracy  
514 of fiber reconstruction with diffusion-MRI data decreases with fiber distance; however, it is still  
515 unclear how to address this methodological limitation.

516 In order to quantify the impact of long-range connections presence in the simulated system, we  
517 filtered down the tracer connectome by removing all the connection not present in the deterministic  
518 diffusion-MRI connectomes. The filtered tracer connectome is shown in Figure 3A.

519

520 **Symmetrized and asymmetrized connectome: the role of fiber directionality**

521 The incapacity to detect fiber directionality is one of the main drawbacks of dMRI method.

522 In order to understand the influence of this property in the simulated system, we symmetrized the  
523 tracer connectome and we asymmetrized the diffusion-MRI connectome.

524 **Symmetrized tracer connectome:**

525 For each asymmetric matrix exists one, and only one, decomposition that enables us to find the  
526 corresponding symmetric matrix: each generic matrix  $A$  can be decomposed in its symmetric and  
527 asymmetric part as:

528 
$$A = A^{\text{sym}} + A^{\text{asym}} = \underbrace{\frac{1}{2}(A + A^T)}_{\text{symmetric part}} + \underbrace{\frac{1}{2}(A - A^T)}_{\text{asymmetric part}}$$

529 thus, symmetrizing a matrix means neglecting its asymmetric part.

530 Following this consideration, the tracer symmetric connectome was defined as the matrix whose  
531 entries  $\hat{t}_{ij}$  are defined as:

532

$$533 \quad \hat{t}_{ij} = \frac{t_{ij} + t_{ji}}{2}$$

534 (2)

535 where  $t_{ij}$  represents the original tracer connection strength between area  $i$  and area  $j$ .

536 The symmetric tracer structural connectivity is shown in Figure 3A.

537

### 538 Asymmetrized dMRI connectome:

539 As opposed to symmetrizing a matrix which is a straightforward procedure, a-symmetrizing a matrix  
540 is an ill-posed problem, since it means introducing a new degree of freedom in the system, and not  
541 a unique solution exists. Thus, to find the asymmetric version of the dMRI connectome we assumed  
542 some constraints: we injected in each connection the same degree of asymmetry contained in the  
543 respective tracer connection, while preserving the dMRI weight balancing. In other words, our  
544 asymmetrization method assumes that the degree of asymmetry is independent on the connection  
545 strength value.

546 We defined the asymmetry degree  $\mu_{ij}$  between connection  $i$  and connection  $j$  as:

547

$$548 \quad \mu_{ij} = \begin{cases} \frac{t_{ij}}{t_{ji}}, \wedge t_{ij} \leq t_{ji} \\ \frac{t_{ji}}{t_{ij}}, \wedge t_{ij} > t_{ji} \end{cases}$$

549 (3)

550 so that:

551 if the  $ij$  connection is symmetric:  $t_{ij} = t_{ji} \Rightarrow \mu_{ij} = +1$

552 if the  $ij$  connection is anti-symmetric:  $t_{ij} = -t_{ji} \Rightarrow \mu_{ij} = -1$

553 However, since the connection strengths in the connectome are always positively defined,  $\mu_{ij}$  is a  
554 value always between 0 and 1.

555 The information on the directionality of the tracer connection between area  $i$  and area  $j$ , measured  
556 by  $\mu_{ij}$ , are inserted in the diffusion-MRI connectome by modifying the original connection  $w_{ij}$  in

557  $\check{w}_{ij}$ :

558 
$$\mu_{ij} = \frac{t_{ij}}{t_{ji}} = \frac{\check{w}_{ij}}{\check{w}_{ji}}$$

559 Specifically, we defined  $\check{w}_{ij} = w_{ij} - k$  and  $\check{w}_{ji} = w_{ji} + k$ , where  $k$  is defined as:

560 
$$\mu_{ij} = \frac{\check{w}_{ij}}{\check{w}_{ji}} = \frac{w_{ij} - k}{w_{ji} + k} \Rightarrow k = w_{ij} \frac{1 - \mu_{ij}}{1 + \mu_{ij}}$$

561 (4)

562 It is important to notice that the asymmetrization of the connectome does not imply the  
563 introduction of new connections: if the original diffusion-MRI connection  $w_{ij}$  is absent it follows,  
564 from the last equation, that also the increment  $k$  will be zero.

565 The asymmetrized deterministic connectome is shown in Figure 3C.

566

### 567 **Hybrid connectome: the role of individual connections**

568 We aimed to study the influence of the technique, the dMRI or the tracer one, in reconstructing the  
569 connections of a specific brain area. For this purpose, we built surrogate connectomes where all the  
570 brain wirings were reconstructed with deterministic dMRI except the connections of the region  
571 under examination that were measured with anatomical tracing.

572 In particular, for each deterministic dMRI connectome  $W$ , composed of  $N$  brain areas, we generated  
573  $N$  different connectomes  $W^k$  by substituting the incoming and outgoing non-zero dMRI connections  
574 of area  $k$  with the corresponding tracer connections. The entry  $w_{ij}^k$  of the hybrid connectome  $W^k$   
575 are defined as:

576

577 
$$w_{ij}^k = \begin{cases} w_{ij} & \text{if } i, j \in [1, 2, \dots, k-1, k+1, \dots, N] \\ t_{kj} & \text{if } i = k \text{ and } w_{ij} \neq 0 \\ t_{ik} & \text{if } j = k \text{ and } w_{ij} \neq 0 \end{cases}$$

578

579 where  $w_{ij}$  and  $t_{ij}$  represent the connection strength of the original-individual deterministic dMRI  
580 and the original tracer connectome, respectively.

581 It is important to notice that this operation does not imply the introduction of new connections.

582

### 583 **1.5. Comparing anatomical connectivities**

584 We quantify the difference in the connectomes using both statistical tools (the Mann-Whitney test

585 and the Pearson correlation) and graph theory tools (54).

586

### 587 **U-static as a measure of connectome similarity**

588 We used the Mann-Whitney test to check if the connections strength of connectomes  $W_i$  and  $W_j$   
589 come from the same distribution. The null hypothesis of the test,  $H_0$ , is that the probability of an  
590 observation, i.e. a connection strength, of the connectome  $W_i$  exceeding an observation from  
591 population  $W_j$  equals the probability of an observation  $W_j$  exceeding an observation from sample  
592  $W_i$ :

$$593 \quad H_0: P(W_i > W_j) = P(W_i < W_j)$$

594 the alternative hypothesis,  $H_1$ , is:

$$595 \quad H_1: P(W_i > W_j) \neq P(W_i < W_j)$$

596 The test involves the calculation of a statistic, usually called U.

597 For sample size above 20, which is our case, the distribution of the U variable under the null  
598 hypothesis can be approximated using the normal distribution. The U variable ranges between 0  
599 and  $n_1 n_2$ , where  $n_1$  and  $n_2$  are the dimensionalities of the two connectomes. For  $U \leq U^* = n_1 n_2 / 2$   
600 the test states that the  $H_0$  can be rejected.

601 It follows that it is possible to normalize the U value between 0 and 1, by dividing it by the product  
602 of the dimensionality of the two connectomes; in this case the discriminator value  $U^*$  is 0.5.

603

### 604 **Graph theory measures**

605 We characterized anatomical mouse brain structures using graph theory tools; in particular, we  
606 characterized each connectome by calculating its degree distribution and its topological properties.

607

#### 608 **Degree distribution**

609 For each connectome, we calculated the directed degree distribution as:

$$610 \quad k_i = k_i^{\text{out}} + k_i^{\text{in}} = \sum_j w_{ij} + \sum_i w_{ij}$$

611 We quantified the probability that the degree distribution comes from a given theoretical  
612 distribution through the Kolmogorov Smirnov test.

613

#### 614 **Topological structure**

615 Topological measures as clustering coefficient and shortest path (and consequently the small world

616 index) are strictly dependent on graph densities, and thus the comparison of topological measures  
617 of different graphs should be carefully accomplished (55).

618 To avoid spurious results from the comparison, we used a modified version of the small world index,  
619 i.e. the Small World Propensity (SWP), as introduced by (36).

620

#### 621 **Pearson correlation as a measure of area's connections peculiarity:**

622 We quantified the peculiarity of an area's connections of a certain animal  $m$  by calculating the  
623 averaged Pearson correlation between the area's connections of the animal  $m$  and the area's  
624 connections in the other animals.

625

#### 626 **Euclidean distance as quantification of hemispheric functional lateralization:**

627 We quantified the functional lateralization of a given region  $x$  as the Euclidean distance between  
628 the functional connections of the left area  $x$  and the functional connections of the right area  $x$ .

629

### 630 **1.6. Simulated resting state dynamics**

631 Using the previously described connectomes we conceptualized the mouse brain as a neuronal  
632 network. The mean activity of each brain region, i.e. the network's node, was defined by the reduced  
633 Wong Wang model (23). In this approach, the dynamics of a region is given by the whole dynamics  
634 of excitatory and inhibitory populations of leaky integrate-and-fire neurons interconnected via  
635 NMDA synapses. Here we take into account the model with a further reduction performed in (13):  
636 the dynamics of the output synaptic NMDA gating variable  $S$  of the  $i$ -th brain area is strictly bound  
637 to the collective firing rate  $H_i$ . The resulting model is given by the following coupled equations:

$$638 \quad \frac{dS_i}{dt} = \frac{-S_i}{\tau_s} + (1 - S_i)\gamma H_i + \sigma\eta_i(t)$$

639 (5)

$$640 \quad H_i = \frac{ax_i - b}{1 - \exp(-d(ax_i - b))}$$

641 (6)

$$642 \quad x_i = \omega J_N S_i + J_N G \sum_j w_{ij} S_j + I_o$$

643 (7)

644 where  $x_i$  is the synaptic input to the  $i$ -th region.  $\gamma$  is a kinetic parameter fixed to 0.641,  $\tau_s$  is the

645 NMDA decay time constant and its value is 100 ms;  $a$ ,  $b$  and  $d$  are the parameters of the input and  
646 output function  $H$  and are respectively equal to  $270 \text{ nC}^{-1}$ , 108 Hz, 0.154 s.  $J_N = 0.2609 \text{ nA}$  is an  
647 intensity scale for the synaptic input current.  $\omega$  is the local excitatory recurrence and  $I_o$  is the  
648 external input current.  $G$  is the coupling strength i.e. a scalar parameter which scales all the  
649 connection strengths  $w_{ij}$  without altering the global topology of the network. We set the noise  
650 amplitude  $\sigma$  of the normally distributed stochastic variable  $\eta_i$  to 0.015 since this level of noise is  
651 able to sustain brain states oscillations.

652 The local excitatory recurrence,  $\omega$ , and of the local excitatory recurrence and  $I_o$  are set to 0.3 nA  
653 and 1, respectively, in order to enrich the non-linearity of the dynamics of each brain region. In this  
654 case, studying the dynamics of isolated brain areas ( $G = 0$  in equation ( 7 ), it is possible to notice  
655 that each brain area is in a bistable state and it oscillates between high and low activity fixed points  
656 (14). It has been noticed in (14) that enriching the non-linearity of each brain areas introduces global  
657 network's attractors that are not in trivial relation with the anatomical connectivity; this model  
658 offers the chance to reproduce the non-stationary features of the functional connectivity patterns,  
659 as shown by the checkboard pattern of the simulated FCD in Figure S1b.

660 For each connectome, we identified the coupling strength values for which the system is  
661 experiencing multistability. The optimal coupling strength range is defined as the values for which  
662 the system low and high states coexist, and it is identified by building the system's bifurcation  
663 diagram as described in (13).

664 The brain activity, for each connectome, is simulated for 40 values of coupling strength that equally  
665 span between 0 and M, where M corresponds to the coupling strength value for which the low state  
666 (identified with the previous method), disappears. The simulations obtained from each  
667 connectome, for different coupling strength value, are used to calculate the predictive power of the  
668 connectome as explained in the section.

669

### 670 **Integration scheme and BOLD signals**

671 Model equations are numerically solved using the Euler Maruyama integration method with a fixed  
672 integration step of 0.1 ms. Simulated BOLD signal is obtained by converting the simulated synaptic  
673 activity (equation ( 5) using the Balloon-Windkessel method (56) with the default value  
674 implemented in The Virtual Brain (57).

675 The BOLD time-series are down-sampled to 2.5 sec according to the temporal resolution of the  
676 experimental data.

677

## 678 **1.7. Resting state signals analysis**

679 Functional connections in the experimental and simulated time-series are explored from both  
680 spatial and temporal point of views using the Functional Connectivity (FC) and the Functional  
681 Connectivity Dynamics (FCD), respectively. We also explored the relation between functional links  
682 by estimating the Functional Meta-Connectivity (FMC).

683

### 684 **Functional Connectivity (FC)**

685 The FC matrix is defined as the matrix whose  $ij$ -th element is the Pearson correlation between the  
686 BOLD signal of the brain region  $i$  and of the brain region  $j$ . An example of empirical and simulated  
687 FC is shown in figure 1.

688

### 689 **Functional Connectivity Dynamics (FCD)**

690 The FCD matrix for the experimental and simulated signals is calculated using the sliding windows  
691 approach (14, 24).

692 To estimate the FCD, the entire BOLD time-series is divided in time windows of a fixed length (2 min)  
693 and with a spanning of 2.5 sec; the data points within each window centered at the time  $t_i$  were  
694 used to calculate  $FC(t_i)$ .

695 The  $ij$ -th element of the FCD matrix is calculated as the Pearson correlation between the upper  
696 triangular part of the  $FC(t_i)$  matrix arranged as a vector and the upper triangular part of the  $FC(t_j)$   
697 matrix arranged as a vector.

698 In order to observe signal correlations at frequency greater than the typical one of the BOLD signals,  
699 the sliding window length is fixed to 2 min, since, as demonstrated by (Leonardi and Van De Ville  
700 2015), the non-spurious correlations in the FCD are limited by high-pass filtering of the signals with  
701 a cut-off equal to the inverse of the window length.

702 An example of empirical and simulated FCD is shown in Figure 1.

703 The typical FCD matrix during resting-state has a checkboard appearance (see experimental FCD in  
704 Figure 1) indicating that the system is switching between stable networks configuration (14, 24). We  
705 quantified the *switching degree* of the simulated and experimental system as the variance of the  
706 triangular part of the FCD once excluded the overlapping entries (i.e. the entries of the FCD matrix  
707 that quantify the correlation of FCs calculated over the sliding window of overlapping time interval).  
708 We called this quantity clue of switching (cs).



709

## 710 **Functional Meta-Connectivity (FMC)**

711 To compare the dynamical evolution of the functional connections between different systems we  
712 calculate, for each system, the FMC. The FMC, of a BOLD signals of  $N$  areas, is a  $N^2 \times N^2$  matrix that  
713 quantifies the inter-region functional correlation of the system. The  $ij$ -th element of the FMC  
714 represents the Pearson correlation between the temporal evolution of the  $i$ -th functional link and  
715 the  $j$ -th functional link.

716

## 717 **1.8. Comparing experimental and simulated BOLD signals**

718 We quantified the ability of a given connectome to be used as a skeleton of the virtual system by  
719 comparing the accordance between the simulated functional connections, generated using that  
720 connectome, and the functional connections arranged during the experimental resting state  
721 recordings.

722 As discussed in the article we used the FC as the metric for quantifying the experimental and  
723 simulated functional connections. Indeed, although the FC metric is not able to capture the non-  
724 stationary nature of the resting state signals, the static functional connections are stable across  
725 resting state recordings in the same animal; on the other hand, FMC, that is able to quantify the  
726 dynamical evolution of the functional connections, is not stable across resting state recordings (see  
727 Figure S1), and thus cannot be used for quantifying the goodness of the simulated activity.

728

729 The simulated functional network is generally composed of more areas than the experimental one  
730 since the simulation is based on the anatomical information that has a greater spatial resolution  
731 than the functional ones. Thus, in order to correlate the eFC and the sFC we reduced them to the  
732 same number of areas. For each virtual mouse brain we simulated for different values of the  
733 coupling strength  $G$  and then select the value of  $G$  for which the simulated neuronal network is able  
734 to obtain the more realistic outcome, i.e. the maximum correlation between the empirical and  
735 simulated FC (12, 14, 58).

736

737 For each mouse,  $m$ , and each session,  $d$ , we defined the  $PP$  of a given connectome  $c$  as the  
738 maximum Pearson correlation between empirical the FC (eFC) and the simulated FC (sFC) obtained  
739 for the different coupling strength values  $G$ :

740

$$PP(c, m, d) = \max_G \{ \text{corr}[sFC(c, G), eFC(m, d)] \}$$

741 The PP of a given connectome  $PP(c)$  is the mean over all the mice and the sessions of the  
742  $PP(c, m, d)$ :

743 
$$PP(c) = \underset{m,d}{mean}\{PP(c, m, d)\}$$

744 Since the tracer connectomes and the diffusion-MRI averaged connectomes are not derived from a  
745 specific animal, the corresponding simulated-FCs are correlated with all the functional data  
746 composing our dataset (irrespective to the mouse in which the functional data were recorded).

747 Diffusion-MRI connectomes, instead, are specific of each animal, and thus the FCs derived from the  
748 connectome of a certain mouse are correlated only with the empirical FC recorded in the same  
749 animal.

750 In order to assess the significance of the difference in PP of differently derived connectomes we  
751 used the p-value calculated through the Welch's test.

752

## 753 REFERENCES:

- 754 1. Sporns O, Tononi G, Kötter R (2005) The human connectome: a structural description of the  
755 human brain. *PLoS Comput Biol* 1(4):e42.
- 756 2. Yeh F-C, et al. (2016) Quantifying differences and similarities in whole-brain white matter  
757 architecture using local connectome fingerprints. *PLoS Comput Biol* 12(11):e1005203.
- 758 3. Mikhael SS, et al. (2019) Manually-parcellated gyral data accounting for all known anatomical  
759 variability. *Sci Data* 6:190001.
- 760 4. Biswal B, Zerrin Yetkin F, Haughton VM, Hyde JS (1995) Functional connectivity in the motor  
761 cortex of resting human brain using echo-planar mri. *Magn Reson Med* 34(4):537–541.
- 762 5. Finn ES, et al. (2015) Functional connectome fingerprinting: identifying individuals using  
763 patterns of brain connectivity. *Nat Neurosci* 18(11):1664–1671.
- 764 6. Gratton C, et al. (2018) Functional brain networks are dominated by stable group and individual  
765 factors, not cognitive or daily variation. *Neuron* 98(2):439–452.
- 766 7. Mueller S, et al. (2013) Individual variability in functional connectivity architecture of the  
767 human brain. *Neuron* 77(3):586–595.
- 768 8. Finn ES, Todd Constable R (2016) Individual variation in functional brain connectivity:  
769 implications for personalized approaches to psychiatric disease. *Dialogues Clin Neurosci*  
770 18(3):277–287.
- 771 9. Sanz Leon P, et al. (2013) The Virtual Brain: a simulator of primate brain network dynamics.  
772 *Front Neuroinformatics* 7:10.
- 773 10. Ghosh A, Rho Y, McIntosh AR, Kötter R, Jirsa VK (2008) Noise during rest enables the  
774 exploration of the brain’s dynamic repertoire. *PLoS Comput Biol* 4(10):e1000196.
- 775 11. Jirsa VK, Jantzen KJ, Fuchs A, Kelso JAS (2002) Spatiotemporal forward solution of the EEG  
776 and MEG using network modeling. *IEEE Trans Med Imaging* 21(5):493–504.
- 777 12. Deco G, Jirsa VK, McIntosh AR (2011) Emerging concepts for the dynamical organization of  
778 resting-state activity in the brain. *Nat Rev Neurosci* 12(1):43.
- 779 13. Deco G, et al. (2013) Resting-state functional connectivity emerges from structurally and  
780 dynamically shaped slow linear fluctuations. *J Neurosci* 33(27):11239–11252.
- 781 14. Hansen EC, Battaglia D, Spiegler A, Deco G, Jirsa VK (2015) Functional connectivity  
782 dynamics: modeling the switching behavior of the resting state. *Neuroimage* 105:525–535.
- 783 15. Jirsa VK, et al. (2017) The Virtual Epileptic Patient: Individualized whole-brain models of  
784 epilepsy spread. *NeuroImage* 145:377–388.
- 785 16. Wedeen VJ, et al. (2008) Diffusion spectrum magnetic resonance imaging (DSI) tractography  
786 of crossing fibers. *Neuroimage* 41(4):1267–1277.
- 787 17. Kötter R (2007) Anatomical Concepts of Brain Connectivity. *Handbook of Brain Connectivity*,

- 788 Understanding Complex Systems. (Springer, Berlin, Heidelberg), pp 149–167.
- 789 18. Oh SW, et al. (2014) A mesoscale connectome of the mouse brain. *Nature* 508(7495):207.
- 790 19. Gămănuț R, et al. (2018) The Mouse Cortical Connectome, Characterized by an Ultra-Dense  
791 Cortical Graph, Maintains Specificity by Distinct Connectivity Profiles. *Neuron* 97(3):698-  
792 715.e10.
- 793 20. Ypma RJ, Bullmore ET (2016) Statistical analysis of tract-tracing experiments demonstrates a  
794 dense, complex cortical network in the mouse. *PLoS Comput Biol* 12(9):e1005104.
- 795 21. Melozzi F, Woodman MM, Jirsa VK, Bernard C (2017) The Virtual Mouse Brain: A  
796 Computational Neuroinformatics Platform To Study Whole Mouse Brain Dynamics.  
797 *eNeuro*:ENEURO–0111.
- 798 22. Bergmann E, Zur G, Bershadsky G, Kahn I (2016) The organization of mouse and human  
799 cortico-hippocampal networks estimated by intrinsic functional connectivity. *Cereb Cortex*:1–  
800 16.
- 801 23. Wong K-F, Wang X-J (2006) A recurrent network mechanism of time integration in perceptual  
802 decisions. *J Neurosci* 26(4):1314–1328.
- 803 24. Allen EA, et al. (2014) Tracking whole-brain connectivity dynamics in the resting state. *Cereb*  
804 *Cortex* 24(3):663–676.
- 805 25. Grandjean J, et al. (2017) Dynamic reorganization of intrinsic functional networks in the mouse  
806 brain. *NeuroImage* 152:497–508.
- 807 26. Laumann TO, et al. (2015) Functional system and areal organization of a highly sampled  
808 individual human brain. *Neuron* 87(3):657–670.
- 809 27. Van Dijk KRA, et al. (2009) Intrinsic Functional Connectivity As a Tool For Human  
810 Connectomics: Theory, Properties, and Optimization. *J Neurophysiol* 103(1):297–321.
- 811 28. Tournier J-D, Calamante F, Connelly A (2012) MRtrix: diffusion tractography in crossing fiber  
812 regions. *Int J Imaging Syst Technol* 22(1):53–66.
- 813 29. Tournier JD, Calamante F, Connelly A (2010) Improved probabilistic streamlines tractography  
814 by 2nd order integration over fibre orientation distributions. *Proceedings of the International*  
815 *Society for Magnetic Resonance in Medicine*, p 1670.
- 816 30. Zalesky A, et al. (2016) Connectome sensitivity or specificity: which is more important?  
817 *Neuroimage* 142:407–420.
- 818 31. Fox MD, Zhang D, Snyder AZ, Raichle ME (2009) The global signal and observed  
819 anticorrelated resting state brain networks. *J Neurophysiol* 101(6):3270–3283.
- 820 32. Craddock RC, et al. (2013) Imaging human connectomes at the macroscale. *Nat Methods*  
821 10(6):524–539.
- 822 33. Li L, Rilling JK, Preuss TM, Glasser MF, Hu X (2012) The effects of connection reconstruction  
823 method on the interregional connectivity of brain networks via diffusion tractography. *Hum*  
824 *Brain Mapp* 33(8):1894–1913.

- 825 34. Kale P, Zalesky A, Gollo LL (2018) Estimating the impact of structural directionality: How  
826 reliable are undirected connectomes? *Netw Neurosci* 2(02):259–284.
- 827 35. Watts DJ, Strogatz SH (1998) Collective dynamics of ‘small-world’ networks. *nature*  
828 393(6684):440.
- 829 36. Muldoon SF, Bridgeford EW, Bassett DS (2016) Small-World Propensity and Weighted Brain  
830 Networks. *Sci Rep* 6(1). doi:10.1038/srep22057.
- 831 37. Mohajerani MH, et al. (2013) Spontaneous cortical activity alternates between motifs defined  
832 by regional axonal projections. *Nat Neurosci* 16(10):1426.
- 833 38. Stafford JM, et al. (2014) Large-scale topology and the default mode network in the mouse  
834 connectome. *Proc Natl Acad Sci* 111(52):18745–18750.
- 835 39. Díaz-Parra A, Osborn Z, Canals S, Moratal D, Sporns O (2017) Structural and functional,  
836 empirical and modeled connectivity in the cerebral cortex of the rat. *Neuroimage* 159:170–184.
- 837 40. Zimmermann J, Griffiths J, Schirner M, Ritter P, McIntosh AR (2018) Subject specificity of the  
838 correlation between large-scale structural and functional connectivity. *Netw Neurosci* 3(1):90–  
839 106.
- 840 41. Rangaprakash D, Wu G-R, Marinazzo D, Hu X, Deshpande G (2018) Hemodynamic response  
841 function (HRF) variability confounds resting-state fMRI functional connectivity. *Magn Reson*  
842 *Med* 80(4):1697–1713.
- 843 42. Desai M, et al. (2010) Mapping brain networks in awake mice using combined optical neural  
844 control and fMRI. *J Neurophysiol* 105(3):1393–1405.
- 845 43. Schlegel F, Schroeter A, Rudin M (2015) The hemodynamic response to somatosensory  
846 stimulation in mice depends on the anesthetic used: implications on analysis of mouse fMRI  
847 data. *Neuroimage* 116:40–49.
- 848 44. Silva AJ, et al. (1997) Mutant mice and neuroscience: recommendations concerning genetic  
849 background. *Neuron* 19(4):755–759.
- 850 45. Sittig LJ, et al. (2016) Genetic background limits generalizability of genotype-phenotype  
851 relationships. *Neuron* 91(6):1253–1259.
- 852 46. Shinohara Y, Hosoya A, Hirase H (2013) Experience enhances gamma oscillations and  
853 interhemispheric asymmetry in the hippocampus. *Nat Commun* 4:1652.
- 854 47. Fornito A, Zalesky A, Breakspear M (2015) The connectomics of brain disorders. *Nat Rev*  
855 *Neurosci* 16(3):159.
- 856 48. Calhoun VD, Lawrie SM, Mourao-Miranda J, Stephan KE (2017) Prediction of Individual  
857 Differences from Neuroimaging Data. *NeuroImage* 145:135–136.
- 858 49. Deco G, Kringelbach ML (2014) Great Expectations: Using Whole-Brain Computational  
859 Connectomics for Understanding Neuropsychiatric Disorders. *Neuron* 84(5):892–905.
- 860 50. Besson P, et al. (2017) Anatomic consistencies across epilepsies: a stereotactic-EEG informed  
861 high-resolution structural connectivity study. *Brain* 140(10):2639–2652.

- 862 51. Greve DN, Fischl B (2009) Accurate and robust brain image alignment using boundary-based  
863 registration. *Neuroimage* 48(1):63–72.
- 864 52. Tournier J-D, Calamante F, Connelly A (2007) Robust determination of the fibre orientation  
865 distribution in diffusion MRI: non-negativity constrained super-resolved spherical  
866 deconvolution. *Neuroimage* 35(4):1459–1472.
- 867 53. Smith RE, Tournier J-D, Calamante F, Connelly A (2013) SIFT: spherical-deconvolution  
868 informed filtering of tractograms. *Neuroimage* 67:298–312.
- 869 54. Rubinov M, Sporns O (2010) Complex network measures of brain connectivity: uses and  
870 interpretations. *Neuroimage* 52(3):1059–1069.
- 871 55. Ginestet CE, Nichols TE, Bullmore ET, Simmons A (2011) Brain network analysis: separating  
872 cost from topology using cost-integration. *PloS One* 6(7):e21570.
- 873 56. Friston KJ, Mechelli A, Turner R, Price CJ (2000) Nonlinear responses in fMRI: the Balloon  
874 model, Volterra kernels, and other hemodynamics. *NeuroImage* 12(4):466–477.
- 875 57. Sanz-Leon P, Knock SA, Spiegler A, Jirsa VK (2015) Mathematical framework for large-scale  
876 brain network modeling in The Virtual Brain. *Neuroimage* 111:385–430.
- 877 58. Deco G, Jirsa VK, McIntosh AR (2013) Resting brains never rest: computational insights into  
878 potential cognitive architectures. *Trends Neurosci* 36(5):268–274.
